# Supplementary material
Source: PubMed Central journal article supplement (PMC4158992)
Supplement: Supp_Data.pdf [file Supp_Data.pdf]

## SUPPLEMENTAL INFORMATION

### SUPPLEMENTAL FIG. 1.

(A) Schematic diagram of AtTPPD showing the site of the T-DNA insertion in *tppd*. Black boxes indicate coding and white boxes intron regions.

(B) qRT-PCR analysis of wild type Col-0, *tppd* and AtTPPD overexpressor lines AtTPPD OE20 and AtTPPD OE22 showing the absence of a full-length *AtTPPD* transcript in *tppd* plants and enhanced *AtTPPD* transcript levels in AtTPPD overexpressor lines. Data are means  $\pm$  relative SD of three independent experiments.

(C) Western-blot analysis of total protein extract from wild type Col-0, *tppd* and AtTPPD-CFP overexpressor lines AtTPPD OE20 and AtTPPD OE22 using an anti-GFP antibody. Upper panel: AtTPPD-CFP protein levels. Lower panel: protein levels (CBB, Coomassie Brilliant Blue).

(D, E) Fresh weight (D) and chlorophyll content (E) of four-week old soil-grown *A. thaliana* wild type Col-0, *tppd* and AtTPPD overexpressor lines AtTPPD OE20 and AtTPPD OE22. Data are means  $\pm$  relative SD of twenty plants per genotype.

(F) Three-week old soil-grown *A. thaliana* wild type Col-0, *tppd* and AtTPPD overexpressor lines AtTPPD OE20 and AtTPPD OE22.

(G, H) Enhanced salt stress tolerance of plants overexpressing AtTPPD. Two-week old soil-grown *A. thaliana* wild type Col-0, *tppd* and AtTPPD overexpressor lines AtTPPD OE20 and AtTPPD OE22 were watered for 3 weeks with 200 mM NaCl. Image of single representative individuals (G) and chlorophyll content (H) of the phenotypes' mean of 20 plants. Asterisks indicate a significant difference (\*\*\*)  $P \leq 0.001$  using Student's *t*-test for pairwise comparison to Col-0 within the same condition.

### SUPPLEMENTAL FIG. 2.

Redox sensitivity of AtTPPD activity. The activity of recombinant, purified AtTPPD was analyzed in the presence of DTT (A) or GSH (B) or increasing concentrations of H<sub>2</sub>O<sub>2</sub> (A) or GSSG (B). To test for AtTPPD reactivation, AtTPPD was oxidized using H<sub>2</sub>O<sub>2</sub> or GSSG, followed by addition of DTT (A) or GSH (B).

### SUPPLEMENTAL FIG. 3.

Protein sequence alignment of AtTPPD and TaTTP using ClustalW. The bottom line represents the degree of homology: (\*) identical amino acid; (:) conserved substitution; (.) semi-conserved

substitution. The cap domain is underlined. The three motifs characteristic for HAD superfamily of phosphatases are boxed. The four cysteine residues in AtTPPD are indicated by arrows.

**SUPPLEMENTAL FIG. 4.**

Amino acid sequence alignment of Arabidopsis TPPs using CLC Main workbench. Cysteine residues are highlighted in boxes, and the positions of C159, C216, C235 and C242 from AtTPPD are indicated by arrows.

**SUPPLEMENTAL TABLE 1**

Specific activities of AtTPP enzyme purifications. Specific activity is expressed as unit per milligram protein. One unit is the amount of enzyme that catalyzes the release of 1 $\mu$ mol inorganic phosphate from trehalose-6-phosphate in one minute at 37°C.

**SUPPLEMENTAL TABLE 2**

List of primers.

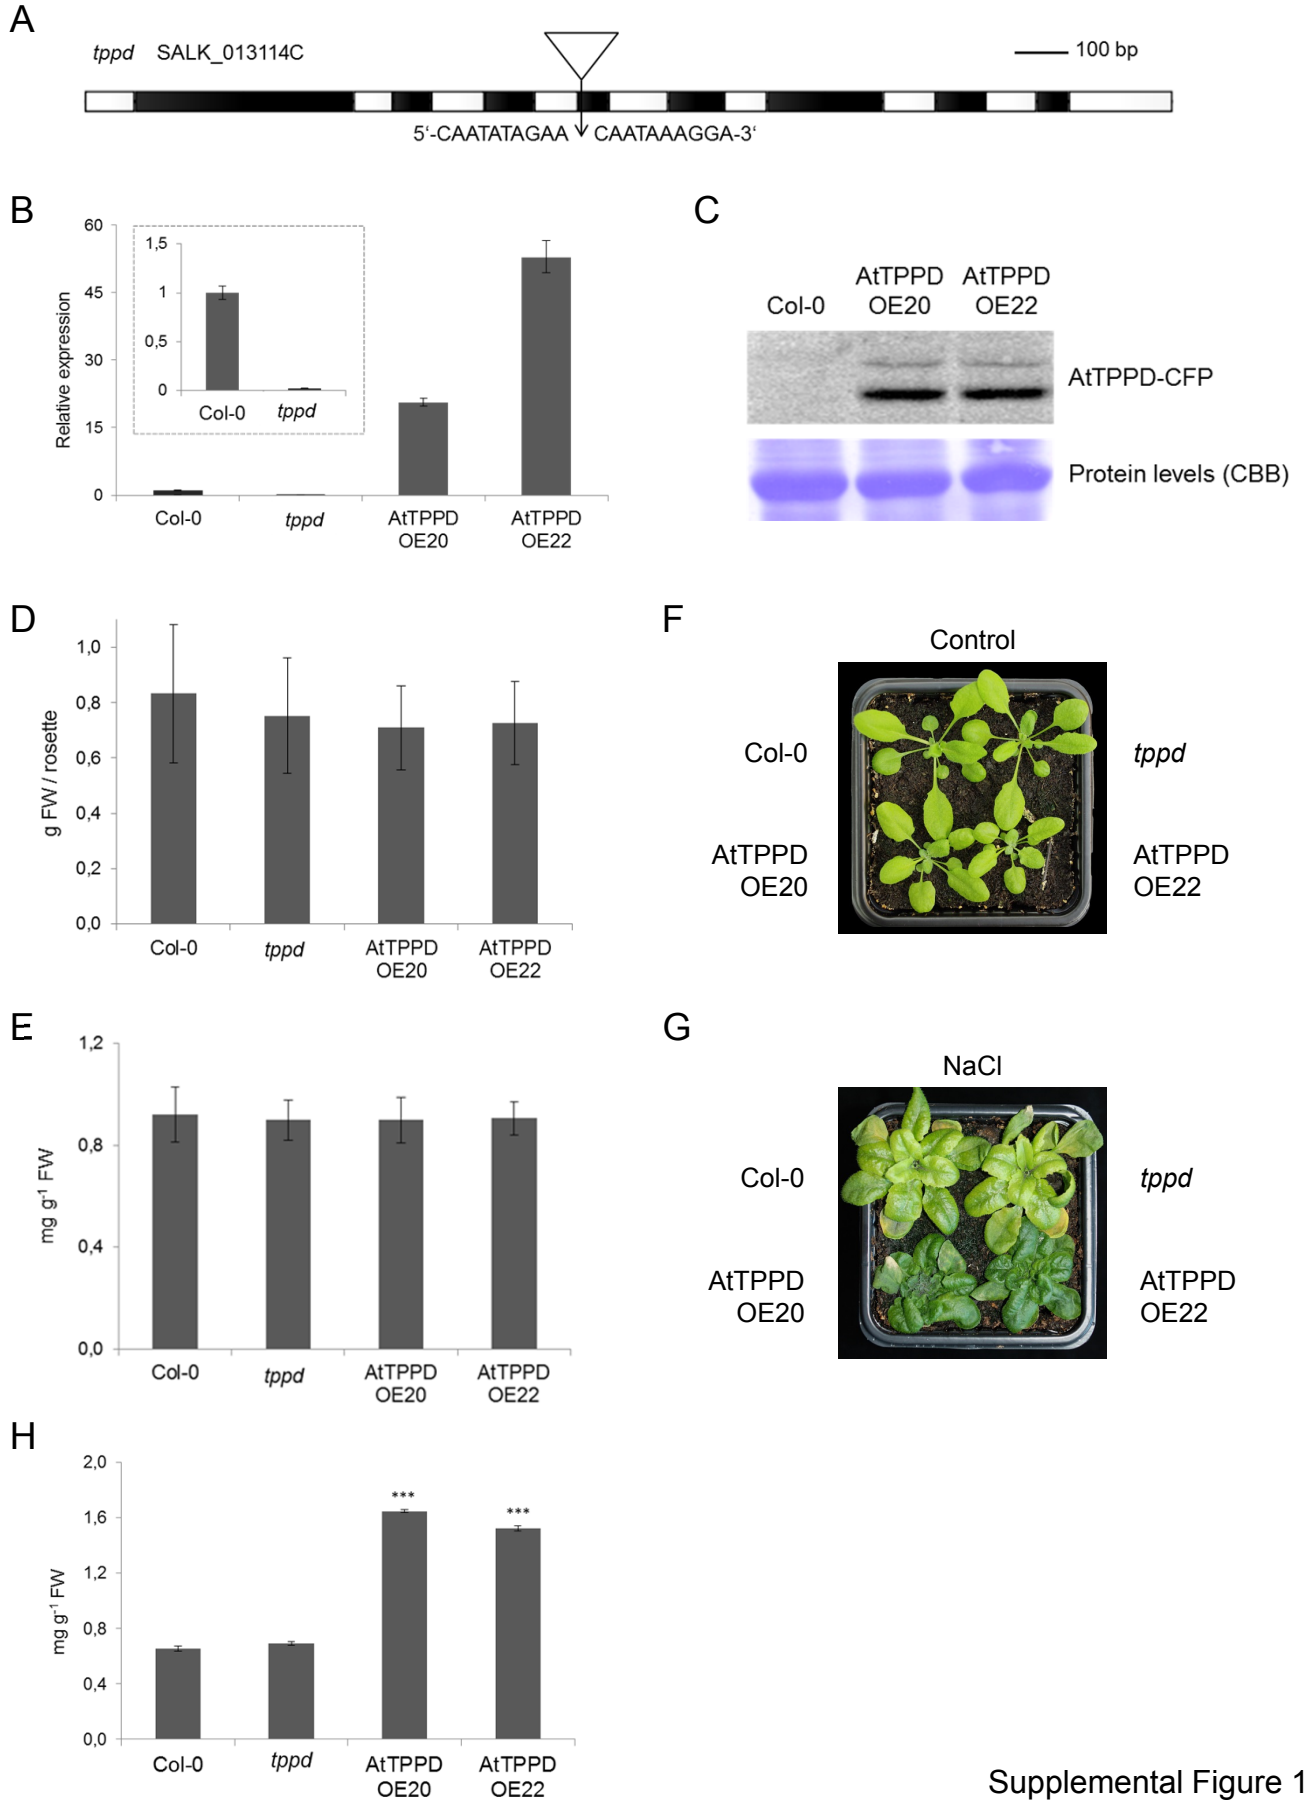

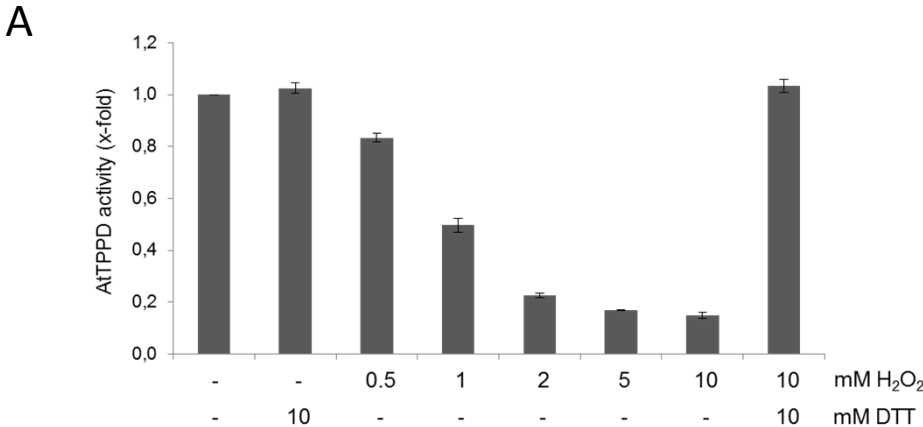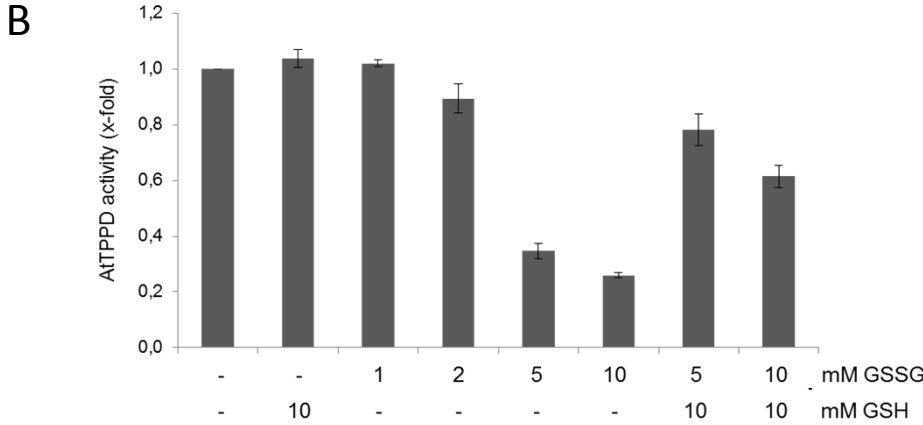

```

AtTPPD      -MTNHNALISDAKGSIGVAVRVPNQSLFSPGGGRYISIPRKKLVQKLEADPSQTRIHTWI
TaTPP      -M-----

AtTPPD      EAMRASSPTRTRPGNISPLPESDEEDEYSSWMAQHPSALTMFEEIAEASKGKQIVMFIDY
TaTPP      -----SLIFIDY
                        : : ****

AtTPPD      DGTLSPIVENPDRAYMSEEMREAVKGVARYFPPTAIVTGRCDKVRRFVKLPGLYYAGSHG
TaTPP      DGLVPIIXNPEESYADAGLLSLISDLKERFDTYIVTGRSPEEISRFLPL-----
          **** ** : ** : : * . : . : . : . * * * * * . : : : ** : *

AtTPPD      MDIKGPSKRKHNKNNKGVLFQ-AANEF↓LPIDK↓VS↓SKCLVEKMRDIEGANVENNKFCVSV
TaTPP      -DINXICYHGACSKINGQIVYNNGSDRFLGVFDRIYEDTRSWVSDFPGLRIYRKNLAVLY
          ** : . : . . * * : : : . : . * * : * : : : . : * : * . : : : . *

AtTPPD      HYRCVDQKDWGLVAEHVTSILSEYPKLRLTQGRK↓VLEIR-PTIKWDK↓GKALEFLLES↓LG↓F
TaTPP      HGLXGADXKPKLRSRIEEIARIFG-VETYYGKXIIELRVP↓GV--NKGSAIRSV-----
          * . . : : : . * : : . * : : * : * * : : * * . * . :

AtTPPD      ANSNDVLP↓PIYIGDDRTDEDAFKVLRNKGQGF↓GILVSKI↓PK-ETSATYSLQ---EPSEVGE
TaTPP      --RGERPAIIAGDDATDEAAFEANDDA-----LTIKVGEGETHAKFHVADYIEXRKILK
          . : . * * * * * * * : . : * . * : : * * * . : : * : : :

AtTPPD      FLQRL-VEWKQMSLRGR
TaTPP      FIEXLGVQKK-----
          * : : * * : *
    
```

|        |              |              |             |              |             |             |                |
|--------|--------------|--------------|-------------|--------------|-------------|-------------|----------------|
|        |              | 20           |             | 40           |             | 60          |                |
| AITPPA | MDMKSGHSSP   | VMTD-SPPIS   | NSRLTIRQNR  | LPYSSAAATA   | ISQNNLLLT   | VPRKKTGILD  | DV----- 61     |
| AITPPB | M---TNQNV    | VSDRKPILGL   | KTITVSVSNS  | PLFS-----    | NSFP--TYFN  | FPRRKLKLL   | EAADKNNLVV 59  |
| AITPPC | M---K-----   | ITD-----     |             |              |             |             | -----I 6       |
| AITPPD | M---TNHNL    | ISDAK--GS    | IGVAVRVPNQ  | SLFSPGGGR    | -----YIS    | IPRKKLV--Q  | KLEADPS-- 51   |
| AITPPE | MVRFIEENI    | --TK--ML     | E--TKAISNS  | EVLYVGGDDG   | DTSP-----   | --TTKVL--H  | DFQINSGGGL 51  |
| AITPPF | MDLNSNHKSS   | VLKDPSPSVN   | QSRL-----   | -----G       | VS--SRFMM   | SQWKKPAKLD  | DV----- 44     |
| AITPPG | MDLNIKTTTP   | VLSDPTTPVS   | KTRL-----   | -----G       | SSFPSGRFMM  | NSRKKIPKLD  | DV----- 47     |
| AITPPH | MVRFIEEN--   | --TK--LV     | EKETGNKSN   | DV-----      | -TTT-----   | --KKKAL--Q  | DIINNGVGL 43   |
| AITPPI | MS--ASQNV    | VSETT--MS    | SIIPNNNNN   | N--NSSSQKL   | P--P-GLIS   | ISKKKLL--K  | NIDIINGG-- 55  |
| AITPPJ | M--VSQNVV    | VSDAK--TG    | IITVSTVSN   | SVFTPTAQKP   | PTAP--GYIS  | VSKKKLL--K  | NLEI-NGADQ 59  |
|        | 80           | 100          | 120         | 140          |             |             |                |
| AITPPA | --KSNGLDA    | MKSSSPPTI    | LNKD-NLS-N  | DATDMTYREW   | MLKYPSALT   | SFEKIMFAK   | GKRIALFLDY 127 |
| AITPPB | APKITSMIDS   | MRDSSPTRLR   | -SSSYDS-VS  | -DNDD-KTSW   | I-VRFPSALN  | MFDEIVNAAK  | GKQIVMFLDY 124 |
| AITPPC | SGKIETLVDS   | LRDMSPTRVR   | -SSFSDHEVS  | -ENDDESSW    | I-ALHPSALD  | MFEQIMRDAE  | GKQIMFLDY 73   |
| AITPPD | QTRIHWTIEA   | MRASSPTRTR   | -PGNISPLPE  | SDEEDEYSSW   | M-AQHPSALT  | MFEELAEASK  | GKQIVMFLDY 119 |
| AITPPE | --IRSWVDS    | MRACSPTRPK   | -----SFNSQ  | -----SCW     | I-KEHPSALN  | MFEELHKSSE  | GKQIVMFLDY 105 |
| AITPPF | --RSGWLDA    | MISSPPRRK    | LVKDFNVEVA  | PEDDFAQRAW   | M-VKYPSAIS  | SFAHIAAQAK  | KKKIAVFLDY 111 |
| AITPPG | --RSGWLDA    | MISSPPRRK    | LVKDFNIEIA  | PEDDFSQRAW   | M-LKYPSAIT  | SFAHIAAQAK  | NKKIAVFLDY 114 |
| AITPPH | --INSWVDS    | MRACSPTHLK   | -----SLLKQ  | -----SSW     | L-TEHPSALD  | MFEELHLSE   | GKQIVMFLDY 97  |
| AITPPI | GQRINAWVDS   | MRASSPTHLK   | -----SLPSS  | ISTQQQLNSW   | I-MQHPSALE  | KFEQIMEASR  | GKQIVMFLDY 119 |
| AITPPJ | SQRLNSWVDS   | MRASSPTHLK   | -----SL-SS  | FSSEEEHNSW   | I-KRHPSALN  | MFERIEEAR   | GKQIVMFLDY 122 |
|        | 160          | 180          | 200         |              |             |             |                |
| AITPPA | DGTLSPIVEE   | PDCAYMSSAM   | RSAVQNVAKY  | FPTAII SGRS  | RDKVYEFVNL  | SELYYAGSHG  | MDIMSPAGES 197 |
| AITPPB | DGTLSPIVED   | PDKAFITHEM   | REVVKDVASN  | FPTAIVTGRS   | IEKVRSFVQV  | NEIYYAGSHG  | MDIEGP---- 190 |
| AITPPC | DGTLSLITED   | HDRAIITDEM   | REVVKEVATY  | FKTAII SGRS  | TDKVQSFVKL  | TGIHYAGSHG  | MDIKGP---- 139 |
| AITPPD | DGTLSPIVEN   | PDRAYMSEEM   | REAVKGVARY  | FPTAIVTGRS   | RDKVRRFVKL  | PGLIYAGSHG  | MDIKGP---- 185 |
| AITPPE | DGTLSPIVDD   | PDRAFMSKKM   | RNTVTKLAKC  | FPTAIVSGRS   | REKVSSFVKL  | TELYYAGSHG  | MDIKGP---- 171 |
| AITPPF | DGTLSPIVDD   | PDRAIMSDAM   | RSAVKDVASY  | FPTAII SGRS  | RDKVYQLVGL  | TELYYAGSHG  | MDIMT---- 176  |
| AITPPG | DGTLSPIVDD   | PDRAIMSDAM   | RAAVKDVASY  | FPTAII SGRS  | RDKVYQLVGL  | TELYYAGSHG  | MDIMTPVNP 184  |
| AITPPH | DGTLSPIVDD   | PDRAFMSRKM   | RRTVTKLANC  | FPTAIVSGRS   | IEKVYNFVKL  | TELYYAGSHG  | MDIKGP---- 163 |
| AITPPI | DGTLSPIVDD   | PDKAFMSSKM   | RRTVTKLANC  | FPTAIVTGRS   | IDKVYNFVKL  | AELYAGSHG   | MDIKGP---- 185 |
| AITPPJ | DGTLSPIVDD   | PDRAFMTSKM   | RRTVTKMKAC  | FPTSIVTGRS   | IDKVYSFVKL  | AELYAGSHG   | MDIKGP---- 188 |
|        | 220          | 240          | 260         | 280          |             |             |                |
| AITPPA | LNHEHSRTV-   | SVYEQGDVDN   | LFQPASEFLP  | MIDKVLCSLI   | ESTDKIKGVK  | VEDNKFCLSV  | HYRNVEEKNW 266 |
| AITPPB | -----TNE     | SNGQSNERV    | LFQPAREFLP  | MIEKVVNILE   | EKTKWIPGAM  | VENNKFCLSV  | HFRRVDEKRW 253 |
| AITPPC | -----TND     | QSNQ--EEV    | MFQPASDYL P | MIDEVVNLK    | EKTKSIPGAT  | VEHNKFCLTV  | HFRRVDEGW 200  |
| AITPPD | -----SKRN    | KHNKNNKGV-   | LFQAAANFLP  | MIDKVSCLLV   | EKMRDIEGAN  | VENNKFCLSV  | HFRVVDQKDW 248 |
| AITPPE | --EQG-SKYK   | K--ENQSL     | LFQPAEFLLP  | VINEVYKCLV   | ENTQSI PGAK | VENNKFCLSV  | HFRVVEENKW 234 |
| AITPPF | --SSDGNCFK   | STDQQGKEVN   | LFQPAKEFIP  | VIDEVFRTL V  | EKMKD IKGAK | VENHKFCLSV  | HYRNVDEKDW 245 |
| AITPPG | GSPEDPNCIK   | TTDQQGEEVN   | LFQPAKEFIP  | VIEEVYNNLV   | EITDKIKGAK  | VENHKFCLSV  | HYRNVDEKDW 254 |
| AITPPH | --EQG-SKYE   | QILQDSKSL-   | LFQPAEFLLP  | MIDEVYHKL V  | EKTKSTPGAQ  | VENNKFCLSV  | HFRRVDENNW 229 |
| AITPPI | --AGFSRHK    | R--VKQSL-    | LYQPANDYLP  | MIDEVYRQLL   | EKTKSTPGAQ  | VENNKFCLSV  | HFRRVDEKDW 249 |
| AITPPJ | --TKGFSRYN   | K--DKPSV-    | LYQPAGDFLP  | MIDEVYKQLV   | EKTKSTPGAQ  | VENNKFCLSV  | HFRRVDEKDW 252 |
|        | 300          | 320          | 340         |              |             |             |                |
| AITPPA | TLVAQCVDV    | IRTYPKLRLT   | HGRKVL EIRP | VIDWDK GKAV  | TFLLESGLGN  | NCEDVLP IYV | GDDRTDEDAF 336 |
| AITPPB | PALAEVVKSV   | LIDYPKLKL T  | QGRKVL EIRP | TIKWDK GKAL  | NFLLKSLGYE  | NSDDVVPVYI  | GDDRTDEDAF 323 |
| AITPPC | AALAEQVRLV   | LIDYPKLRLT   | QGRKVL EIRP | SIKWDK GKAL  | EFLNLSLGI A | ESKDVLPVYI  | GDDRTDEDAF 270 |
| AITPPD | GLVAEHVRLV   | LSEYPKLRLT   | QGRKVL EIRP | TIKWDK GKAL  | EFLLESGLGFA | NSNDVLP IYI | GDDRTDEDAF 318 |
| AITPPE | SDLAHQVRSV   | LKNYPKLM L T | QGRKVL EIRP | IIKWDK GKAL  | EFLLESGLYD  | NCIDVFP IYI | GDDRTDEDAF 304 |
| AITPPF | PIIAQRVHDH   | LKQYPR LRLT  | HGRKVL EIRP | VIDWNKGRAV   | EFLLESGLS   | NKDDL P IYI | GDDTTDEDAF 315 |
| AITPPG | PLVAQRVHDH   | LKRYPR LRLT  | HGRKVL EIRP | VIEWNKGRAV   | EFLLESGLS   | NNDFLP IFI  | GDDTTDEDAF 324 |
| AITPPH | SDLANQVRSV   | MKDYPK LRLT  | QGRKVL EIRP | IIKWDK GKAL  | EFLLESGLYA  | NCIDVFP IYI | GDDRTDEDAF 299 |
| AITPPI | SELVLQVRSV   | LKKFPTLQLT   | QGRKVL EIRP | MI EWDK GKAL | EFLLESGLFG  | NTNNVFPVYI  | GDDRTDEDAF 319 |
| AITPPJ | SELASKVRSV   | VKNYPTL KLS  | QGRKVL EIRP | IIKWNK GKAL  | EFLLESGLFE  | NCIDVFP IYI | GDDKTDEDAF 322 |
|        | 360          | 380          | 400         |              |             |             |                |
| AITPPA | KVLRDGNH G   | YGILVSAV PK  | DSNAFYSLRD  | PSEVME-FLK   | S---LVTW-   | ---KRSMG-   | 385            |
| AITPPB | KVLR E-RGQ G | FGILVSKV PK  | DTNASYSLQD  | PSQVNK-FLE   | ---RLVEWK   | R--KTVGEE   | 374            |
| AITPPC | KVLC E-RGQ G | FGIIVSKT IK  | ETYSATYSLQD | PSQVKE-FLE   | ---RLVWK    | K--QLTGE    | 320            |
| AITPPD | KVLRN-KGQ G  | FGILVSKIPK   | ETSATYSLQE  | PSEVGE-FLQ   | ---RLVEWK   | Q--MSLRGR   | 369            |
| AITPPE | KILRD-KKQ G  | LGILVSKYAK   | ETNASYSLQE  | PDEV MV-FLE  | ---RLVEWK   | Q--SRC-GA   | 354            |
| AITPPF | KVLRD-NRG    | FGILVSSIPK   | ESNAFYSLRD  | PSEVKK-FLK   | T---LVKWA   | KLEKNSTGF   | 368            |
| AITPPG | KVLR E-NRG   | FGILVSSV PK  | ESNAFYSLRD  | PSEVKK-FLK   | T---LVKWA   | KMSSKTSF    | 377            |
| AITPPH | KVLR E-RRQ G | LGILVSKF PK  | ETSATYSLQE  | PDEV ME-FLQ  | ---RLVEWK   | Q--LRS-GA   | 349            |
| AITPPI | KMLRD-RGEG   | FGILVSKF PK  | DTNASYSLQD  | PSEASDGFLT   | TIGGMETNAA  | K--NV--G    | 372            |
| AITPPJ | KLLRG-RGQ G  | FGILVSKF PK  | DTNASYSLQD  | PPEVMN-FL-   | ---GRLVEWK  | Q--MQ--Q    | 370            |

|                  | <b>Specific activity</b> |
|------------------|--------------------------|
| AtTPPA           | 0,073                    |
| AtTPPE           | 0,037                    |
| AtTPPH           | 0,058                    |
| AtTPPD           | 0,057                    |
| AtTPPD_C159S     | 0,069                    |
| AtTPPD_C216S     | 0,062                    |
| AtTPPD_C235S     | 0,040                    |
| AtTPPD_C242S     | 0,031                    |
| AtTPPD_C159/235S | 0,051                    |

| Gene          | Primer Name       | Primer Sequence                                 | Purpose    |
|---------------|-------------------|-------------------------------------------------|------------|
| AtTPPA        | AtTPPA cDNA_Inf   | (F) 5'-ggatctgctggtgcgGACATGAAATCTGGTCACTC-3'   | Cloning    |
|               |                   | (R) 5'-ccagcgctaccagcgccACCCATTGATCTCTTCCATG-3' | Cloning    |
| AtTPPB        | AtTPPB cDNA_Inf   | (F) 5'-ggatctgctggtgcgACTAACCAGAATGTCATCGT-3'   | Cloning    |
|               |                   | (R) 5'-ccagcgctaccagcgccCTCTTCTCCCACTGTCTTCC-3' | Cloning    |
| AtTPPC        | AtTPPC cDNA_Inf   | (F) 5'-ggatctgctggtgcgAAGATTACGGATATTTCCGG-3'   | Cloning    |
|               |                   | (R) 5'-ccagcgctaccagcgccTTCTCCAAGTGTGGTTTCT-3'  | Cloning    |
| AtTPPD        | AtTPPD cDNA_Inf   | (F) 5'-ggatctgctggtgcgACAAACCATAATGCCTTAAT-3'   | Cloning    |
|               |                   | (R) 5'-ccagcgctaccagcgccTCTTCCTCTTAGTGACATTT-3' | Cloning    |
|               | qRT_AtTPPD_ex5/6  | (F) 5'-GTTGATCAAAAAGGACTGGGG-3'                 | qRT-PCR    |
|               |                   | (R) 5'-CCCATTTGATGGTTGGTCGA-3'                  | qRT-PCR    |
|               | AtTPPD_ex1        | (F) 5'-TCAAAAAGGGAAACAAATCGTG-3'                | Genotyping |
|               | AtTPPD_ex6        | (R) 5'-GAGATTCGACCAACCATCAAA-3'                 | Genotyping |
| AtTPPE        | AtTPPE cDNA_Inf   | (F) 5'-ggatctgctggtgcgGTTAGATTCATCGAAGAAAA-3'   | Cloning    |
|               |                   | (R) 5'-ccagcgctaccagcgccTGCCCCACACCTTGACTGTT-3' | Cloning    |
|               | qRT_AtTPPE_ex9/10 | (F) 5'-AGATGATCGTACCGACGAAGACG-3'               | qRT-PCR    |
|               |                   | (R) 5'-TACGCAAAGGAGACTAATGC-3'                  | qRT-PCR    |
| AtTPPF        | AtTPPF cDNA_Inf   | (F) 5'-ggatctgctggtgcgGATTTAACTCAAACCACAA-3'    | Cloning    |
|               |                   | (R) 5'-ccagcgctaccagcgccAAAACCAGTAGAATTCTTCT-3' | Cloning    |
| AtTPPG        | AtTPPG cDNA_Inf   | (F) 5'-ggatctgctggtgcgGATTTGAATATAACAAGAC-3'    | Cloning    |
|               |                   | (R) 5'-ccagcgctaccagcgccAAAACCTGTTTTGAACTTT-3'  | Cloning    |
| AtTPPH        | AtTPPH cDNA_Inf   | (F) 5'-ggatctgctggtgcgGTTAGATTCATAGAAGAAAA-3'   | Cloning    |
|               |                   | (R) 5'-ccagcgctaccagcgccTGCTCCAGATCTCAATTGTT-3' | Cloning    |
| AtTPPI        | AtTPPI cDNA_Inf   | (F) 5'-ggatctgctggtgcgTCAGCTAGTCAAAACATTGT-3'   | Cloning    |
|               |                   | (R) 5'-ccagcgctaccagcgccCATTCTTGGCTGCATTTGTT-3' | Cloning    |
| AtTPPJ        | AtTPPJ cDNA_Inf   | (F) 5'-ggatctgctggtgcgGTGAGCCAAAACGTCGTCGT-3'   | Cloning    |
|               |                   | (R) 5'-ccagcgctaccagcgccTTGCTGCATCTGTTTCCACT-3' | Cloning    |
| AtPP2A        | qRT_AtPP2A        | (F) 5'-TAACGTGGCCAAAATGATGC-3'                  | qRT-PCR    |
|               |                   | (R) 5'-GTTCTCCACAACCGCTTGGT-3'                  | qRT-PCR    |
| Ubiquitin1    | qRT_Ubiquitin1    | (F) 5'-ATGCAGATCTTCGTGAAAACC-3'                 | qRT-PCR    |
|               |                   | (R) 5'-CTACTTGATCTTCTTCTTAGGCCTC-3'             | qRT-PCR    |
| Salk T-DNA LB | SK_LB             | (R) 5'-GTTACGCTAGTGGGCCATCG-3'                  | Genotyping |
